# Supplementary figures and images for: Improved brain MRI indices in the acute brain stem infarct sites treated with hydroxyl radical scavengers, Edaravone and hydrogen, as compared to Edaravone alone. A non-controlled study
Source: Springer Nature journal article supplement (doi:10.1186/2045-9912-1-12), 2011-01-01

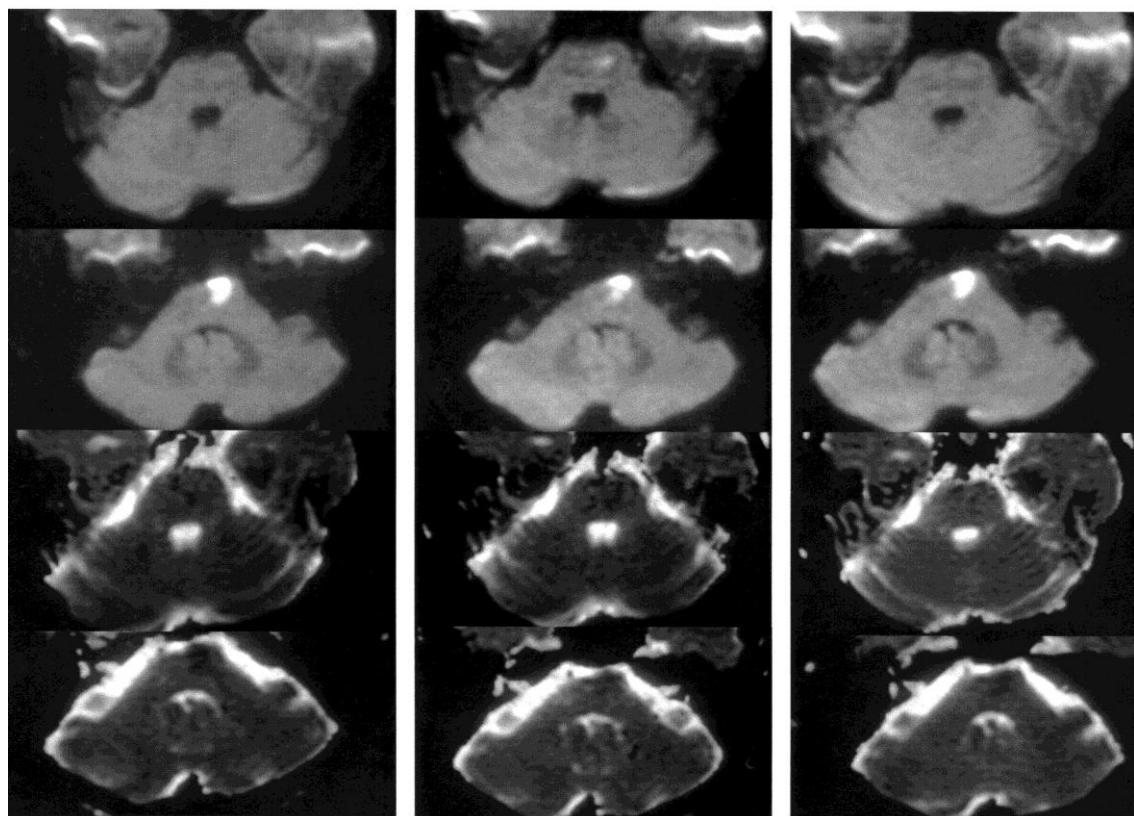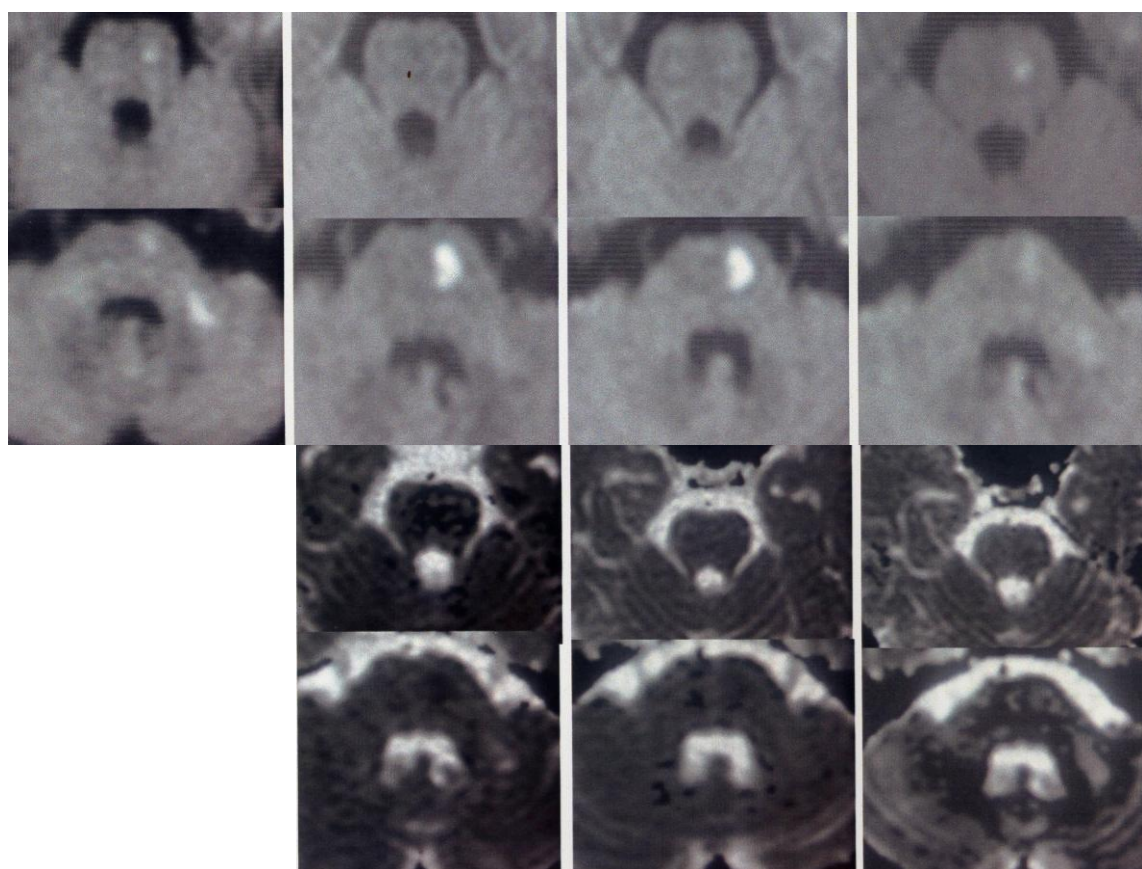

Supplement: 13618_2011_10_MOESM1_ESM.pdf [file 13618_2011_10_MOESM1_ESM.pdf]
